# Supplementary material for: Effects of Black Raspberry Extract and Protocatechuic Acid on Carcinogen-DNA Adducts and Mutagenesis, and Oxidative Stress in Rat and Human Oral Cells
Source: Oxford University Press journal article supplement (doi:10.1158/1940-6207.capr-16-0003), 2016-06-07
Supplement: 19406207capr160003-sup-160352_1_supp_3474474_r6k9dw.docx [file 19406207capr160003-sup-160352_1_supp_3474474_r6k9dw.docx]

**Supplemental data**

**Fig. 1.**

HPLC of 5 ng DBPDE incubated in keratinocyte growth medium overnight at room temperature in the absence (lower trace) and presence of BRB extract (10 ug/ml, middle trace) or (50ug/ml, upper trace). Medium containing 250 pg of tetrols was applied to the column. The elution was performed using Shimadzu LC20AD system and a Waters C18 Symmetry column (2.1 x 150mm, 3.5 micron particle size) at a flow rate of 0.17 ml/min in a pH 4.0, 10 mM ammonium phosphate buffer containing 45%acetonitrile. A fluorescence detector (Shimadzu, RF10Axl) was set at 344 nm excitation and 400 emission. Two peaks (in addition to peaks from the medium) were detected. Based on the identification of the DBPDE-induced adducts (see Fig. 2) these have been designated (-)-anti-trans-DBPDD tetrol I and (-)-anti-trans-DBP tetrol II.
